# Supplementary material for: Biocuration of a Transcription Factors Network Involved in Submergence Tolerance during Seed Germination and Coleoptile Elongation in Rice (Oryza sativa)
Source: Plants (Basel). 2023 May 29;12(11):2146. doi: 10.3390/plants12112146 (PMC10255735; doi:10.3390/plants12112146)
Supplement: Supplementary file 1 [file plants-12-02146-s001.zip › Supplementary Table S1.xlsx]

## Sheet: Sheet1
Supplementary Table1: Promoter analysis of 57 Transcription Factors (TFs) involved in the submergence tolerance during rice seed germination and coleoptile elongation under submergence.
				<------Group 1 TFs (total 11)---->												<--------Group 2--TFs (total 16)------>																	<------Group3 TFs (total 4)---------->					<---Group 4 TFs (total 4--------->)					<-----Group 5 TFs-(total 14)-->
			Target genes-->	Os01g0159300	Os02g0181300 (TF)	Os02g0646200	Os02g0676800	Os02g0677300	Os02g0713700	Os02g0764700	Os03g0315400	Os04g0301500	Os08g0471000	Os09g0486500		Os01g0246700	Os01g0665500	Os01g0826400	Os03g0198600	Os03g0341000 (bait)	Os03g0437200	Os04g0612500	Os05g0361700	Os05g0474800	Os05g0553400	Os05g0583000	Os06g0670300	Os08g0428400	Os08g0474000	Os09g0334500	Os12g0123800		Os03g0622100	Os03g0727000 (bait)	Os05g0129700	Os07g0129700		Os01g0285300	Os05g0140100 (bait)	Os05g0589400	Os06g0264200		Os01g0141000	Os01g0975300	Os02g0579000	Os02g0641300	Os02g0656600	Os02g0828900	Os03g0182800
TFs (listed below)													START HERE
Gene ID	UniProt ID	Gene name		Q0JQI1	Q6QHD1	Q6H630	Q6EP81	Q6EP77	Q6ZFU2	Q6Z7P9	Q10MB4	Q0JEB7	Q6Z9R8	A3C039		Q0JP37	Q0JKL7	Q6IEQ7	Q10QF2	Q10LN8	Q75KE5	B9FCG2	Q6L4M2	Q65WW1	Q6I634	Q75HY3	A0A0P0X0C0	Q6ZJU3	Q0J525	Q6ERI5	Q5CD17		Q10GM4	P46609	Q7GDL5	O80416		Q9AQV2	Q688D6	Q6I5E6	Q0DD26		Q9AWS0	Q0JFK3	Q0E046	Q0DZ73	Q6H6G7	Q6K7P0	Q7XBH8
Transcription factors with binding sites of the target genes				Os01g0159300	OSWRKY71	OSBBX6	OSERF20	OSERF25	Os02g0713700	OSERF103	OSMYB2	RERJ1	HSFB4A	SAP1		OSWRKY1	OSWRKY16	OSWRKY24	HOX12	OSERF66	ZFP36	OsHyPRP16	OSERF61	OSWRKY70	OSMYB55	OSWRKY8	OSMPH1	OSJAZ3	OSERF104	OSWRKY74	NAC77,		Os03g0622100	OSH1	OSH71	OSH15		OSMYB61	OSMYB2P-1	Os05g0589400	OSCOL16		EREBP129	OSMYB48	OSNAC1	Os02g0641300	OSERF32	OsJMJ-C4	OSEBP89
Os01g0141000	Q9AWS0	EREBP129, OsRAV2, OsRAV9, OsTEM1		X	X	X	Os02g0676800 promoter has binding sites for Os01g0141000 TF at -799 (-strand)/ttcCAACAgaag /score 1; and at -826 (- strand)/acccCAGGTgca/score 0.99	x	x	x	Os03g0315400 promoter has binding sites for Os01g0141000 TF at -452 (-strand)/gaccCAGGTggg/score 1	Os04g0301500 promoter has binding sites for Os01g0141000 TF at -318 (-strand)/ acaCAACAgaag/score .96 ; and at -97 (- strand)/ tgtcCAGGTgtg/score 0.99; and at -60/cccACCTGccag/score 0.98	Os08g0471000 promoter has binding sites for Os01g0141000 TF at -473 (-strand)/ gtgCAACAcatg/score 0.98; and at -183 (- strand)/caggCAGGTgca/score 0.98; and at +96 (+ strand)/agtgTGTTGcta/score 0.97	x		Os01g0246700 promoter has one binding site for TF Os01g0141000 at -647 (+strand)/cacACCTGcatc/score 0.98.	X	X	X	Os03g0341000 promoter has one binding site for TF Os01g0141000 at -589 (-strand)/gcccCAGGTggc/score 0.99.	Os03g0437200 promoter has one binding site for TF Os01g0141000 at -365 (-strand)/aggtCAGGTggg/score 0.99.	X	Os05g0361700 promoter has one binding site for TF Os01g0141000 at -11 (+strand)/agtgTGTTGcta/score 0.97.	Os05g0474800 promoter has three binding sites for TF Os01g0141000 at -864 (+strand)/gacACCTGaaat/score 0.99; at -363 (-strand)/ccgCAACAgaat/score 1; and at -155 (+strand)/gtcACCTGctca/score 0.98.	X	X	Os06g0670300 promoter has one binding site for TF Os01g0141000 at -63 (-strand)/aggCAACAaaca/score 0.98.	Os08g0428400 promoter has two binding site for TF Os01g0141000 at -759 (-strand)/tggcCAGGTggg/score 0.99; and at -260 (+strand)/cccACCTGtcgg/0.98.	Os08g0474000 promoter has two binding site for TF Os01g0141000 at -564 (-strand)/gttcCAGGTgag/score 1; and at -153 (+strand)/cccACCTGtgcg/0.98.	Os09g0334500 promoter has two binding sites for TF Os01g0141000 at -935 (+ strand)/ttcACCTGaaaa/score .99; and at -428 (-strand)/cacCAACAtata/0.96.	X		Os03g0622100 promoter contains one binding site for TF at -772 (+strand)/atcACCTGgcat/score.99.	Os03g0727000 promoter contains one binding site for TF Os01g0141000 at -616 (+strand)/cacACCTGtagc/score.98.	Os05g0129700 promoter contains one binding site for TF Os01g0141000 at +59 (-strand)/caagCAGGTgac/score.98	Os07g0129700 promoter contains one binding site for TF Os01g0141000 at -658 (-strand)/tccCAACAtaaa/score1.		Os01g0285300 promoter has one binding site for the TF Os01g0141000 at -290 (+strand)/attaTGTTGtta/score 0.96.	X	X	Os06g0264200 promoter has one binding site for the TF Os01g0141000 at -233 (-strand)/ctgaCAGGTgtg/score 0.98.		Os01g0141000 promoter contains two binding sites for self/Os01g0141000 at -456 (-strand)/aggCAACAttgt/score0.96; and at -330(+strand)/accACCTGtaat/score0.98.	Os01g0975300 promoter has one binding site for TF Os01g0141000 at -243 (+strand)/gattTGTTGcac/score.98	X	X	X	X	X
Os09g0287000 (bait)	Q6EN65/A3BWY6 was used. The Q6EN65 has been incorrecttly used before for sub1A. That needs to be corrected.	Sub1B, OsERF#063, OsERF63, AP2/EREBP166		X	X	X	X	X	X	X	X	X	X	X		X	Os01g0665500 promoter has five binding sites for TF Os09g0287000 at -539 (-strand)/gtcggCGGCG/score 0.99; and att -58 (-strand)/ggCGGCGg/score 1; and at +3 (+strand)/ggCGCCGccg/score 0.99; and at +30(+strand)/CGCCGccgcg/score 0.99; and at +92 (+strand)/cCGCCGcc/score 1	Os01g0826400 promoter has one binding site for TF Os09g0287000 at -91 (+strand)/CGCCGcca/score 1.	Os03g0198600 promoter has one binding site for TF Os09g0287000 at -363 (-strand)/tCGCCGgc/score 1.	Os03g0341000 promoter has two binding sites for TF Os09g0287000 at -520 (-strand)/ctaggCGGCG/score .099; and at +34(+strand)/CGCCGccggt/score 0.99	X	Os04g0612500 promoter has two binding sites for TF Os09g0287000 at +67 (+strand)/CGCCGcca/score 1; and at +60(+strand)/cCGCCGcc/score 1	Os05g0361700 promoter has two binding sites for TF Os09g0287000 at -330 (+strand)/ttGCCGCc/score 1; and at +83(+strand)/gcCGGCGc/score 1.	X	X	X	X	X	Os08g0474000 promoter has one binding site for TF Os09g0287000 at -717 (-strand)/tggCGGCG/score 1.	Os09g0334500 promoter has one binding site for TF Os09g0287000 at -76 (-strand)/tCGCCGtc/score 1.	X		Os03g0622100 promoter has one binding sites for TF Os09g0287000 at -508 (+ strand)/cCGCCGcc/score 1.	X	X	X		X	X	Os05g0589400 promoter has four binding sites for the TF Os09g0287000 at -950 (-strand)/gcaggCGGCG/score 0.99; and at -626 (-strand)/gCGCCGtc/score1; at -593(+strand)/gcCGGCGt/score1; and at -522(-strand)/gGCGGCaa/score1	Os06g0264200 promoter has two binding sites for the TF Os09g0287000 at +75 (-/+strand)/gCGCCGgc/score 1; and at +18/ggCGGCGg/score1.		X	Os01g0975300 promoter has binding site for TF Os09g0287000 at -767(+strand)/CGCCGcca/score1.	X	X	X	Os02g0828900 promoter has two binding site for TF Os09g0287000 at +59 (-strand)/tggCGGCG/score1; and at +78 (-strand)/ggCGGCGg/score1.	Os03g0182800 promoter has two binding site for TF Os09g0287000 at -72 (+strand)/gaCGGCGa/score1; and at +86 (+strand)/cCGCCGcc/score 1.
Os02g0677300	Q6EP77	OSERF25, OsDREB1G, AP2/EREBP138, OsDREB1I		X	X	Os02g0646200 promoter has 2 TF (Os02g0677300) binding site at -246 (+strand)/aCCGAC/score 1; and -258 (-strand) /GTCGGc/score ).	X	Os02g0677300 promoter has three TF (for self) binding sites at +81(-strand) /GTCGGg /score 0.95 and at -140 (+ strand)/ cCGCCGgc/score0.95 and at -196(+ strand)/ tCCGAC/ score 0.95	Os02g0713700 promoter has one TF (os02g0677300) binding site at -274 (- strand)/ GTCGGa/score 0.95	Os02g0764700 promoter has two TF () binding sites at -25 (+ strand)/aCCGAC/score 1 and at +53 (+strand)/aCCGAC/score 1	Os03g0315400 promoter has one TF (os02g0677300) binding site at -28 (- strand)/cCCGAC/ score 0.95	Os04g0301500 promoter has one TF (os02g0677300) binding site at 14 (- strand)/GTCGGa/ score 0.95	Os08g0471000 promoter has two TF (os02g0677300) binding site at -653 (- strand)/GTCGGc/ score 1 and at -949(+strand)/gCCGAC/ score 1	Os09g0486500 promoter has two TF (os02g0677300) binding site at -246 (+strand)/aCCGAC/ score 1 and at -859(+strand)/gCCGAC/ score 1		Os01g0246700 promoter has two binding sites for TF Os02g0677300 at -357 (-strand)/GTCGGt/score 1; and -168 (-strand)/GTCGGc/score 1.	X	X	Os03g0198600 promoter has two binding sites for Os02g0677300 (ERF-TF) at -781 (+ strand)/cCCGAC/score 0.95; and at -695 (-strand)/GTCGGt/score 1.	Os03g0341000 promoter has two binding sites for TF Os02g0677300 at -481 (- strand)/GTCGGt/score 1; and at -554 (- strand)/GTCGGc/score 1.	X	X	Os05g0361700 promoter has two binding sites for Os02g0677300 TF at +65 (+strand)/gCCGAC/score 1; and at -622 (- strand)/GTCGGt/score 1	X	Os05g0553400 promoter has one binding site for TF Os02g0677300 at +5 (- strand)/GTCGGt/score 1.	Os05g0583000 promoter has one binding site for TF Os02g0677300 at -626 (+strand)/cCCGAC/score 0.95.	x	Os08g0428400 promoter has three binding sites for TF Os02g0677300 at -253 (- strand)/GTCGGt/score 1; at -266 (+ strand)/cCCGAC/score 00.95; and at -640 (- strand)/GTCGGg/score 0.95.	Os08g0474000 promoter has one binding site for Os02g0181300 TF at -425 (+ strand)/aCCGAC/score 1.	Os09g0334500 promoter has one binding site for TF Os02g0677300 at -117 (+ strand)/tCCGAC/score 0.95.	Os12g0123800 promoter has one binding site for Os02g0181300 TF at -332 (-strand)/GTCGGt/score 1.		Os03g0622100 promoter has one binding site for Os02g0677300 TF at -759 (-strand)/GTCGGc/score 1	X	X	X		Os01g0285300 promoter has one binding site for Os02g0677300 TF at -141(+strand)/aCCGAC/score 1.	X	X	Os06g0264200 promoter has one binding site for Os02g0677300 TF at +48 (-strand)/GTCGGc/score 1.		X	Os01g0975300 promoter has two binding sites for Os02g0677300 TF at -725 (-strand)/GTCGGc/score 1; and at -166 (+strand)/gCCGAC/score 1.	X	X	Os02g0656600 promoter has one binding site for Os02g0677300 TF at +87 (+strand)/tCCGAC/score 0.95.	X	Os03g0182800 promoter has one binding site for Os02g0677300 TF at -63 (+strand)/gCCGAC/score 1.
Os08g0545500	Q0J3Y6	OSERF29/OsERF28/#028, OsDERF4, AP2/EREBP161, OsDREB1J, OsDREB1I, OsDREB1G		X	X	Os02g0646200 promoter has binding sites for Os08g0545500 TF at -258 (-strand)/GTCGGc /score 1; and at -246(-+strand)/aCCGAC/ score 1	X	Os02g0677300 promoter has binding sites for Os08g0545500 TF at -196 (+strand)/tCCGAC /score 0.95; and at -140(+strand)/cCCGAC/score .95; and at +81 (- strand)/GTCGGg/score 0.95	Os02g0713700 promoter has binding sites for Os08g0545500 TF at -274 (- strand)/GTCGGa/score 0.95	Os02g0764700 promoter has binding sites for Os08g0545500 TF at -25(+strand)/ aCCGAC/score 1 and at +53 (+ strand)/aCCGAC/score 1	Os03g0315400 promoter has binding sites for Os08g0545500 TF at -28 (+strand)/cCCGAC/score 0.95	Os04g0301500 promoter has binding sites for Os08g0545500 TF at +14 (+ strand)/ GTCGGa/score .95	Os08g0471000 promoter has binding sites for Os08g0545500 TF at -949 (+strand)/gCCGAC /score 1 and at -653 (- strand)/GTCGGc/score 1	Os09g0486500 promoter has binding sites for Os08g0545500 TF at -859 (+ strand)/ gCCGAC/score 1; and at -246(+ strand)/aCCGAC /score 1		Os01g0246700 promoter has three binding sites for TF Os08g0545500 at -357 (-strand)/GTCGGt /score 1; and -168 (-strand)/GTCGGc/score 1.	X	X	Os03g0198600 promoter has two binding sites for TF Os08g0545500 at -781 (+strand)/cCCGAC/score 0.95; and at -695(-strand)/GTCGGt /score 1.	Os03g0341000 promoter has two binding sites for TF Os08g0545500 at -554 (-strand)/GTCGGc/score 1; and at -481 (-strand)/GTCGGt/score 1.	X	X	Os05g0361700 promoter has three binding site for TF Os08g0545500 at -622 (-strand)/GTCGGt/score 1; and at +65(+strand)/gCCGAC/score 1.	X	Os05g0553400 promoter has one binding site for TF Os08g0545500 at +5 (-strand)/GTCGGt/score 1.	Os05g0583000 promoter has one binding site for TF Os08g0545500 at -626 (+strand)/cCCGAC/score .95.	X	Os08g0428400 promoter has three binding site for TF Os08g0545500 AT -640 (-strand)/GTCGGg/score 0.95; at-263 (+strand)/cCCGAC/score 0.95; and at -253 (-strand)/GTCGGt/score 1.	Os08g0474000 promoter has one binding site for TF Os08g0545500 at -425 (+ strand)/aCCGAC/score 1.	Os09g0334500 promoter has one binding site for TF Os08g0545500 at -117 (+strand)/tCCGAC/score .95.	Os12g0123800 promoter has one binding site for TF Os08g0545500 at -332 (-strand)/GTCGGt/score 1.		Os03g0622100 promoter has one binding sites for TF Os08g0545500 at -759 (-strand)/GTCGGc/score 1.	X	X	X		Os01g0285300 promoter has one binding site for the TF Os08g0545500 at -141 (+strand)/aCCGAC/score 1.	X	X	Os06g0264200 promoter has one binding site for the TF Os08g0545500 at +48 (-strand)/GTCGGc/score 1.		X	Os01g0975300 promoter has two binding sites for TF Os08g0545500 at -725(-strand)/GTCGGc/score 1; and at -166(+strand)/gCCGAC/score1.	X	X	Os02g0656600 promoter has one binding site for TF Os08g0545500 at +87(+strand)/tCCGAC/score 0.95.	X	Os03g0182800 promoter has one binding site for TF Os08g0545500 at -63 (+strand)/gCCGAC/score 1.
Os02g0656600	Q6H6G7	OSERF32, OsERF032/32, AP2/EREBP21		X	X	Os02g0646200 promoter has binding sites for Os02g0656600 TF at -260 (-strand)/ agGTCGGcaa/score 0.99; and at -247 (--strand)/ caCCGACc/score 0.99.	X	Os02g0677300 promoter has binding sites for Os02g0656600 TF at +80 (+strand)/cGTCGGgg /score 0.9	Os02g0713700 promoter has binding sites for Os02g0656600 TF at -275 (- strand)/cGTCGGag/score 0.9	Os02g0764700 promoter has binding sites for Os02g0656600 TF at +52 (+strand)/caCCGACc /score 0.99; and at -26 (+ strand)/aaCCGACc/score 0.95	Os03g0315400 promoter has binding sites for Os02g0656600 TF at -29 (+ strand)/ccCCGACa/score 0.93	Os04g0301500 promoter has binding sites for Os02g0656600 TF at +13 (- strand)/ aGTCGGag/score .9	Os08g0471000 promoter has binding sites for Os02g0656600 TF at -951 (+ strand)/cggCCGACa/score 1; and at -654 (- strand)/cGTCGGcgt/score 0.99	Os09g0486500 promoter has binding sites for Os02g0579000 TF at -941 (-strand)/cCACGCcacg /score .99		Os01g0246700 promoter has three binding sites for TF Os02g0656600 at-550 (+strand)/CGGTGcaccg/score 0.96; and at -358 (-strand)/cGTCGGtc /score 0.93; and -169 (-strand)/gGTCGGcca/score 0.99.	X	X	Os03g0198600 promoter has two binding sites for TF Os02g0656600 at -782 (+strand)/acCCGACa/score 0.91; and at -697(-strand)/tcGTCGGttg /score 0.99.	Os03g0341000 promoter has two binding sites for TF Os02g0656600 at -555 (-strand)/tGTCGGcga/score 1; and at -483 (-strand)/gcGTCGGtga/score 0.99.	X	Os04g0612500 promoter has two binding sites for TF Os02g0656600 at -318 (-strand)/caGTCGGttt/score 0.99; and at -170 (+strand)/ccaCCGACtc/score .99.	Os05g0361700 promoter has three binding site for TF Os02g0656600 at -624 (-strand)/gcGTCGGtaa/score 0.99; and at -551 (-strand)/ggccgCACCG/score 0.97; and at +64(+strand)/cgCCGACttc/score 0.99.	X	Os05g0553400 promoter has one binding site for TF Os02g0656600 at +3 (-strand)/cgGTCGGtct/score .99.	Os05g0583000 promoter has one binding site for TF Os02g0656600 at -626 (+strand)/cCCGACat/score .97.	X	Os08g0428400 promoter has one binding site for TF Os02g0656600 at -255 (-strand)/ctGTCGGtga/score 1.	Os08g0474000 promoter has one binding site for TF Os02g0656600 at -425 (+ strand)/aCCGACat/score 1.	Os09g0334500 promoter has one binding site for TF Os02g0656600 at -117 (+strand)/tCCGACat/score .97.	Os12g0123800 promoter has one binding site for TF Os02g0656600 at -334 (-strand)/agGTCGGttc/score .99.		Os03g0622100 promoter contains one binding site for TF Os02g0656600 at -760 (-strand)/cGTCGGctg/score 0.99.	X	X	X		Os01g0285300 promoter has one binding site for the TF Os02g0656600 at -143 (+strand)/ccaCCGACgt/score 0.99.	X	Os05g0589400 promoter has one binding site for the TF Os02g0656600 at -692 (+strand)/aaaCCGACct/score 0.99.	Os06g0264200 promoter has one binding site for the TF Os02g0656600 at +47 (-strand)/aGTCGGcgc/score 0.99.		X	Os01g0975300 promoter has two binding sites for TF Os02g0656600 at -726 (-strand)/cGTCGGccc/score.99 and at -168 (+strand)/atgCCGACg/score1.	X	X	Os02g0656600 promoter has one binding site for self/Os02g0656600 at +86(+strand)/ctCCGACt/score.9	X	Os03g0182800 promoter has one binding site for TF Os02g0656600 at -65 (+strand)/acgCCGACg/score 0.99.
Os05g0361700	Q6L4M2	OSERF61, AP2/EREBP93		X	X	X	X	X	Os02g0713700 promoter has binding sites for Os05g0361700 TF at -400 (+strand)/gCGCCGcc/score 1; and at -252 (+ strand)/gCGCCGcc/score 1	X	X	X	Os08g0471000 promoter has binding sites for Os05g0361700 TF at +88 (- strand)/ggCGGCGc /score 1	Os09g0486500 promoter has binding sites for Os05g0361700 TF at -172 (+strand)/ttGCCGCc /score 1; and at -13 (+strand)/CGCCGcca/score 1		X	X	Os01g0826400 promoter contains binding site for os05g0361700 (TF-AP2) at -91(+strand)/ CGCCGcca/ score 1	X	Os03g0341000 promoter has binding sites of Os05g0361700 (AP2-TF) at +34 (+strand)/CGCCGccggt/score 0.99; and at -520 (-strand)/ctaggCGGCG/score 0.99.	X	X	Os05g0361700 promoter contains one binding site for TF Os05g0361700 at -330/ttGCCGCc/score 1	X	X	X	X	X	Os08g0474000 promoter contains one binding site for TF Os05g0361700 at -717(-strand)/tggCGGCG/score1.	X	X		Os03g0622100 promoter has one binding site for TF Os05g0361700 at -507 (+strand)/CGCCGcca/score 1.	X	X	X		X	X	X	Os06g0264200 promoter has one binding site for the TF Os05g0361700 at +18 (-strand)/ggCGGCGg/score 1.		X	Os01g0975300 promoter has one binding site for TF Os05g0361700 at -768 (+strand)/cCGCCGcc/score 1.	X	X	X	X	Os03g0182800 promoter has one binding site for TF Os05g0361700 at +86 (+strand)/cCGCCGcc/score 1.
Os03g0341000 (bait)	Q10LN8	OSERF66, AP2/EREBP30		X	X	X	Os02g0676800 promoter has binding sites for Os03g0341000 TF at -405 (+strand)/gaCGGCGc /score 1	Os02g0677300 promoter has binding sites for Os03g0341000 TF at -346 (-strand)/tCGCCGtc /score 1; and at -174 (-strand)/ cCGCCGgc/score 1; and at +88 (-strand)/ aCGCCGtc/score 1	Os02g0713700 promoter has binding sites for Os03g0341000 TF at -40- (+strand)/gCGCCGccc/score 1; and at -253 (+ strand)/cgcGCCGCcg/score 1	X	Os03g0315400 promoter has binding site for Os03g0341000 TF at -413(+strand)/gaCGGCGc/score 1; and at -140 (-strand)/ ttGCGGCgtt/score 1	X	Os08g0471000 promoter has binding sites for Os03g0341000 TF at +87 (-strand)/aggCGGCGc /score 1	Os09g0486500 promoter has binding sites for Os03g0341000 TF at -849 (+strand)/gaCGGCGa /score 1; and at -172 (+strand)/ttGCCGCc/score 1; and at -14 (-strand)/tCGCCGcca/score 1		X	X	Os01g0826400 promoter contains one binding site for Os03g0341000 (ERF66) at -93(+strand)/tgCGCCGcca/score 1	Os03g0198600 promoter has one binding site for TF Os03g0341000 at -363 (-strand)/ tCGCCGgc/score 1.	Os03g0341000 promoter has two binding sites for self/Os03g0341000 at +32 (+strand)/atcGCCGCcg/score1; and at -518 (-strand)/aggCGGCGa/score 1.	X	X	Os05g0361700 promoter contains two binding site for TF Os03g0341000 at 83 (+ strand)/gcCGGCGc/score 1 and at -330 (+strand)/ttGCCGCc/score 1	X	Os05g0553400 promoter contains one binding site for Os03g0341000 (TF) at -94 (-strand)/tgGCGGCtgg/score 1.	X	X	X	Os08g0474000 promoter contains one binding site for TF Os03g0341000 at -718(-strand)/atggCGGCGt/score 1.	Os09g0334500 promoter contains one binding site for TF Os03g0341000 at -76 (-strand)/tCGCCGtc/score 1.	X		Os03g0622100 promoter has one binding site for TF Os03g0341000 at -508 (+strand)/cCGCCGcc/score 1.	X	X	X		X	X	X	X		X	Os01g0975300 promoter has one binding site for TF Os03g0341000 at -768 (+ strand)/cCGCCGcc/score .	X	x	x	Os02g0828900 promoter has three binding sites for TF Os03g0341000 at -2 (+strand)/gcaGCCGCca /score 1; at +60 (-strand)/ggCGGCGg/score 1; and at +78 (-strand)/ggCGGCGg/score 1.	Os03g0182800 promoter has a binding site for TF Os03g0341000 at -72 (+strand)/gaCGGCGa/score 1; and at +86 (+ strand)/cCGCCGcc/scorre 1
Os07g0674800 (bait)	Q69J87	OSERF67		X	Os02g0181300 promoter has binding sites for Os07g0674800 TF at -952 (- strand)/tgGCGGCggt/score 1; and at -873 (- strand)/cgGCGGCggc/score 1; and at -783 (+ strand)/ gccGCCGCcg/score 1; and at-719 (+ strand)/ gccGCCGCcg/score 1; and at -168 (+ strand)/ gccGCCGCcg/score 1; and at -94 (- strand)/cgGCGGCggc/score 1	X	Os02g0676800 promoter has binding sites for Os07g0674800 TF at -405 (+ strand)/ gaCGGCGc/score 1	Os02g0677300 promoter has binding sites for Os07g0674800 TF at -346 (- strand)/tCGCCGtc /score 1; and at -174 (- strand)/ cCGCCGgc/score 1; and at +88 (- strand)/aCGCCGtc /score 1	Os02g0713700 promoter has binding sites for Os07g0674800 TF at -400 (+ strand)/ gCGCCGccc/score 1; and at -253 (+ strand)/cgcGCCGCcg/score 1	x	Os03g0315400 promoter has binding sites for Os07g0674800 TF at -413 (+strand)/gaCGGCGc/score 1; and at -140 (- strand)/ttGCGGCgtt/score 1	x	Os08g0471000 promoter has binding sites for Os07g0674800 TF at +87 (-strand)/aggCGGCGc /score 1	Os09g0486500 promoter has binding sites for Os07g0674800 TF at -849 (+ strand)/gaCGGCGa /score 1; and at -172 (+ strand)/ttGCCGCc /score 1; and at +13(+ strand)/CGCCGcca/score 1		X	Os01g0665500 promoter has five binding sites for TF Os07g0674800 at -540 (-strand)/ggtCGGCGg/score 1; and att -58 (-strand)/ggCGGCGg/score 1; and at +4(+strand)/gCGCCGccgt/score 1; and at +28(+strand)/ggcGCCGCcg/score 1; and at +92(+strand)/cCGCCGcc/score 1	Os01g0826400 promoter has one binding site for TF Os07g0674800 at -91 (-strand)/CGCCGcca/score 1.	Os03g0198600 promoter has one binding site for TF Os07g0674800 at -363 (-strand)/tCGCCGgc/score 1.	Os03g0341000 promoter has two binding sites for TF Os07g0674800 at -518 (-strand)/aggCGGCGa/score 1; and at +32(+strand)/atcGCCGCcg/score 1	X	Os04g0612500 promoter has two binding sites for TF Os07g0674800 at +67 (+strand)/CGCCGcca/score 1; and at +60(+strand)/cCGCCGcc/score 1.	Os05g0361700 promoter has two binding sites for TF Os07g0674800 at -330 (+strand)/ttGCCGCc/score 1; and at +83(+strand)/gcCGGCGc/score 1.	X	Os05g0553400 promoter has one binding site for TF Os07g0674800 at -94 (-strand)/tgGCGGCtgg/score 1.	X	X	X	Os08g0474000 promoter has one binding site for TF Os07g0674800 at -717 (-strand)/tggCGGCG/score 1.	Os09g0334500 promoter has one binding site for TF Os07g0674800 at -76 (-strand)/tCGCCGtc/score 1.	X		Os03g0622100 promoter has one binding sites for TF Os07g0674800 at -508 (+ strand)/cCGCCGcc/score 1.	X	X	X		X	X	X	X		X	Os01g0975300 promoter has one binding site for TF Os07g0674800 at -767(+strand)/CGCCGcca/score1.	X	X	X	Os02g0828900 promoter has three binding sites for TF Os07g0674800 at -2 (+strand)/gcaGCCGCca/score1; at +59 (-strand)/tggCGGCG/score 1; and at +78(-strand)/ggCGGCGg/score 1.	Os03g0182800 promoter has two binding sites for TF Os07g0674800 at -72 (+strand)/gaCGGCGa/score 1; and at +85 (+strand)/accGCCGCcg/score 1.
Os02g0764700	Q6Z7P9	OSERF103, OsDERF5, AP2/EREBP130		X	X	X	Os02g0676800 promoter has 1 TF (Os02g0764700) binding site at -405(+strand)/gaCGGCGc /score 1	os02g0677300 promoter has three TF (os02g0764700) binding sites at +88(-strand) /aCGCCGtc / ascore1 and at -174 (-strand)/ cCGCCGgc/score1 and at -346 (+STRAND)/ tCGCCGtc/ score1	os02g0713700 promoter has two TF (os02g0764700) binding sites at -252(+strand)/gcGCCGCcgg/score1 and at -400(+ strand)/ gCGCCGcc/ score 0.99	x	os03g0315400 promoter has two TF(os02g0764700) binding sites at -140 (- strand)/ttGCGGCgtt/score 1 and at -413(+ strand)/gaCGGCGc/score 1	x	Os08g0471000 promoter has one TF (Os02g0764700) binding site at 86 (- strand)/gaggCGGCGc/score 1	os09g0486500 promoter has three TF (os02g0764700) binding sites at -14 (+strand)/tcGCCGCcat/score 1 and at -172(+ strand)/ttGCCGCc/score 1 and at -849 (+ strand)/gaCGGCGa/score 1		Os01g0246700 promoter has one binding site for TF Os02g0764700 at -550 (+strand)/CGGTGcaccg/score 0.96	X	Os01g0826400 promoter has one binding site for Os02g0764700 at -93 (+strand)/tgcGCCGCca/score 1.	Os03g0198600 promoter has one binding site for Os02g0764700 at -363 (-strand)/tCGCCGgc/score 1.	Os03g0341000 promoter has two binding sites for Os02g0764700 at -33 (+strand)/tcGCCGCcgg/score 1; and at -519 (-strand)/taggCGGCGa/score .99	X	X	Os05g0361700 promoter has binding site for Os02g0764700 at +81 (+strand)/gcCGGCGc/score 1; and at -330 (+ strand)/ttGCCGCc/score 1; and at -551(- strand)/ggccgCACCG/score 0.97	X	Os05g0553400 promoter has one binding site for Os02g0764700 at -94 (-strand)/tgGCGGCtgg/score 1.	X	X		Os08g0474000 promoter has one binding site for Os02g0764700 at -718(-strand)/atggCGGCGt/score 1.	Os09g0334500 promoter has one binding site for Os02g0764700 at -76 (-strand)/tCGCCGtc/score 1.	X		Os03g0622100 promoter has one binding site for Os02g0764700 TF at -508 (+strand)/cCGCCGcc/score 1.	X	X	X		X	X	Os05g0589400 promoter has four binding sites for Os02g0764700 TF at -522 (-strand)/gGCGGCaa/score 1; at -593 (+strand)/gcCGGCGt/score 1; at -626 (-strand)/gCGCCGtc/score 1; and at -949 (-strand)/caggCGGCGc/score 0.99.	Os06g0264200 promoter has a binding site for Os02g0764700 TF at +18 (- strand)/ggCGGCGg/score 1; and +77 (+ strand)/gcCGGCGg/score 1		X	Os01g0975300 promoter has a binding site for Os02g0764700 TF at -768 (+ strand)/cCGCCGcc/score 1	X	X	x	Os02g0828900 promoter has three binding sites for Os02g0764700 TF at -2 (+strand)/gcaGCCGCca /score 1; at +60 (-strand)/ggCGGCGg/score 1; and at +78 (- strand)/ggCGGCGg/score 1.	Os03g0182800 promoter has two binding sites for Os02g0764700 TF at -72 (+strand)/gaCGGCGa/score 1; and at +86 (+strand)/cCGCCGcc/score 1.
Os08g0474000	Q0J525	OSERF104, OsDERF3, AP2/EREBP152		X	Os02g0181300 promoter has binding sites for Os08g0474000 TF at -952 (- strand)/tgGCGGCggt/score 1; and at -873 (- strand)/cgGCGGCggc/score 1; and at -783 (+ strand)/ gccGCCGCcg/score 1; and at-719 (+ strand)/ gccGCCGCcg/score 1; and at -168 (+ strand)/ gccGCCGCcg/score 1; and at -94 (- strand)/cgGCGGCggc/score 1	X	X	X	X	X	Os03g0315400 promoter has binding sites for Os08g0474000 TF at -140 (- strand)/ttGCGGCgtt /score 1	X	X	Os09g0486500 promoter has binding sites for Os08g0474000 TF at -15 (-strand)/ctcGCCGCca /score 1		X	Os01g0665500 promoter contains two binding site for Os08g0474000 (ERF-TF) at -56/cgGCGGCggc (- strand)/score 1 and at at +91(+strand)/gccGCCGCcg/score 1	Os01g0826400 promooter has binding site for os08g0474000 (TF-AP2) at -93 (+strand)/ tgcGCCGCca/ score 1	X	X	X	Os04g0612500 promoter contains one binding site for Os08g0474000 at +62 (+strand)/ gccGCCGCcg/score 1.	X	X	Os05g0553400 promoter contains one binding site for Os08g0474000(TF) at -94 (-strand)/tgGCGGCtgg/score 1	X	X	X	Os08g0474000 promoter contains one binding site for (self/Os08g0474000 ) at -717 (-strand)/tgGCGGCgtt/score1.	X	X		Os03g0622100 promoter has one binding site for TF Os08g0474000 at -509 (+strand)/gccGCCGCca/score 1.	X	X	X		X	X	X	Os06g0264200 promoter has one binding site for the TF Os08g0474000 at +18 (-strand)/agGCGGCggc/score 1.		X	Os01g0975300 promoter has one binding site for TF Os08g0474000 at -769 (+strand)/gccGCCGCca/score 1	X	X	X	Os02g0828900 promoter has a binding site for TF Os08g0474000 at -2 (+ strand) /gcaGCCGCca /score 1; and at +60 (- strand)/tgGCGGCgg/score 1; and at +77 (- strand)/agGCGGCGg/score 1.	Os03g0182800 promoter has one binding site for TF Os08g0474000 at +85 (+strand)/accGCCGcc/score 1.
Os03g0727000 (bait)	P46609	OSH1, OSKN1, HB75		Os01g0159300 promoter has binding sites for Os03g0727000 TF at -885 (+strand)/TGACA /score 1	X	Os02g0646200 promoter has binding sites for Os03g0727000 TF at -644 (+strand)/TGACg /score 1; and at -599 (-+strand)/TGACC/score 1; and at -586 (- strand)/GGTCA/score 1; and at -334 (+strand)/ TGACA/score 1; and at -326 (+strand)/TGACA/score 1; and at -264(-strand)/CGTCA/score 1; and at -250 (- strand)/GGTCA/score 1; and at -236 (+ strand)/TGACC/score 1; and at -182(+ strand)/TGACT/score 1; and a…	Os02g0676800 promoter has binding sites for Os03g0727000 TF at -984 (+strand)/TGACC /score 1; and at -896 (+ strand)/TGACT/score 1; and at -775 (-strand)/TGTCA/score 1; and at -655 (+ strand)/ TGACG/score 1; and at -547 (- strand)/CGTCA/score 1 and at -12 (+ strand)/TGACA/score 1	Os02g0677300 promoter has binding sites for Os03g0727000 TF at -813 (+strand)/TGACA /score 1; and at -399 (+ strand)/CGTCA/score 1; and at -775 (-strand)/TGTCA/score 1; and at -655 (+ strand)/ TGACG/score 1; and at -547 (- strand)/CGTCA/score 1 and at -12 (+ strand)/TGACA/score 1	Os02g0713700 promoter has binding sites for Os03g0727000 TF at -984 (+strand)/TGACA /score 1; and at -496 (+ strand)/TGACC/score 1; and at -88 (-strand)/ATGCA/score 1	Os02g0764700 promoter has binding sites for Os03g0727000 TF at -459 (-strand)/TGTCA /score 1; and at -175 (- strand)/AGTCA/score 1; and at +49 (+strand)/TGACA/score 1	Os03g0315400 promoter has binding sites for Os03g0727000 TF at -463 (+strand)/TGACA /score 1; and at -356(- strand)/AGTCA/score 1; and at -348 (- strand)/GGTCA/score 1	Os04g0301500 promoter has binding sites for Os03g0727000 TF at -916 (+strand)/TGACG /score 1; and at -863 (- strand)/TGTCT/score 1; and at -792 (-strand)/GGTCA/score 1; and at -599 (+strand)/TGACA/score 1; and at -460 (- strand)/TGTCA/score 1	Os08g0471000 promoter has binding sites for Os03g0727000 TF at -970 (-strand)/CGTCA /score 1; and at -931 (- strand)/TGTCA/score 1; and at -907 (+strand)/TGACA/score 1; and at -895 (-strand)/CGTCA/score 1; and at -803 (- strand)/GGTCA/score 1; and at -491 (-strand)/TGTCA/score 1; and at +15 (+ strand)/TGACA/score 1; at +54 (+ strand)/TGACG/score 1; at +95 (-strand)/CGTCA/score 1	Os09g0486500 promoter has binding sites for Os03g0727000 TF at -993 (-strand)/CGTCA /score 1; and at -467 (- strand)/TGTCA/score 1; and at -402 (-strand)/GGTTCA/score 1; and at -305 (-strand)/TGTCA/score 1; and at -290 (+ strand)/TGACG/score 1		Os01g0246700 promoter contains five binding sites for TF Os03g0727000 at -783 (+strand)/TGACC/score 1; and at -712 (+strand)/ TGACC/score 1; at -672 (+strand)/ TGACC/score 1; at -480 (+strand)/gTGACAgc /score 1; and at -129 (+ strand)/ TGTCA/score 1	X	Os01g0826400 promoter contains ten binding sites for TF Os03g0727000 (OSH1) at -780 (+strand)/TGACT/score 1; at -743 (-strand)/CGTCA/score 1; at -700 (+strand)/ TGACT/score 1; at -680 (+strand)/TGACT/score 1; at -634 (-strand)/ GGTCA/score 1; at -572 (+strand)/TGACC/score 1; at -249 (-strand)/GGTCA/score 1; at -121 (-strand)/CGTCA/score 1; at -85 (-strand)/ AGTCA/score 1; and at -65 (+strand)/ TG…	Os03g0198600 promoter contains eight binding site for TF Os03g0727000 at -908 (-strand)/GGTCA /score 1; at -845 (+ strand)/TGACG/score 1; at -648 (-strand)/GGTCA/score 1; at -385 (+ strand )/TGACG /score 1; at -256 (+strand)/TGACG/score 1; at -240 (- strand)/AGTCA/score 1; at +19 (-strand)/GGTCA/score 1; and at +31(-strand)/ TGTCA/score 1.	Os03g0341000 promoter contains five binding sites for TF Os03g0727000 at -933 (-strand)/TGTCA/score 1; at -651 (-strand)/GGTCA/score 1; at -306 (-strand)/GGTCA/score 1; at -221 (-strand)/AGTCA/score 1; and at +14 (- strand)/CGTCA/score 1.	Os03g0437200 promoter contains four binding sites for TF Os03g0727000 at -632 (-strand)/ AGTCA/score 1; at -364 (-strand)/GGTCA/score 1; at -193 (+ strand)/TGACC/score 1; and at -138 (+strand)/TGACT/score 1.	X	Os05g0361700 promoter contains five binding sites for TF Os03g0727000 at -937 (- strand)/TGTCA /score 1; at -706 (+strand)/ TGACA/score 1; at -471 (+strand)/TGACC/score 1; at -277 (- strand)/AGTCA/score 1; and at -190 (-strand)/ TGTCA/score 1.	Os05g0474800 promoter has over 10 binding sites for TF Os03g0727000 at -888 (+ strand)/TGACT /score 1; at -729 (+ strand)/TGACA /score 1; at -515 (- strand)/GGTCA /score 1; at -256 (-strand)/AGTCA/score 1; at -156 (-strand)/ CGTCA/score 1; and -63(+strand)/ TGACC/score 1.	Os05g0553400 promoter has eight binding sites for TF Os03g0727000 at -962 (+ strand)/TGACG /score1; at -847 (+ strand)/TGACA /score 1; at -780 (+ strand)/TGACC /score 1; at -712 (-strand)/ GGTCA/score 1; at -518 (+ strand)/TGACA /score 1; at -354 (- strand)/ TGTCA/score 1; at -200 (+ strand)/ TGACG/score 1; and +54 (+ strand)/ TGACG/score 1	Os05g0583000 promoter has seven binding sites for TF Os03g0727000 at -714 (+strand)/ TGACG/score 1; at -616(-strand)/ GGTCA/score 1; at -393 (-strand)/ GGTCA/score 1; at -368 (+strand)/TGACT /score 1; at -239 (- strand)/ AGTCA/score 1; at -208(- strand)/AGTCA /score 1; and at +61(-strand)/ AGTCA/score 1.	Os06g0670300 promoter contains eight binding sites for TF Os03g0727000 at -881 (+strand)/TGACT /score 1; at -757 (- strand)/ CGTCA/score 1; at -635 (+ strand)/TGACC /score 1; at -486 (- strand)/ TGTCA/score 1; at -388 (- strand)/ TGTCA/score 1; at -357 (- strand)//score 1; -147 (+strand)/ TGACC/score 1; and at -136 (-strand)/ GGTCA/score1.	Os08g0428400 promoter contains eight binding sites for TF Os03g0727000 at -990 (-strand)/GGTCA /score 1; -880 (+strand)/TGACG /score 1; at -741 (-strand)/CGTCA /score 1; at -598 (+strand)/ TGACT/score 1; at -457 (-strand)/AGTCA/score 1; at -289 (+strand)/TGACA /score 1; at -248 (+strand)/TGACC /score 1; and at +43 (-strand)/GGTCA/score 1.	X	Os09g0334500 promoter contains six binding sites for TF Os03g0727000 at -783 (-strand)/AGTCA /score 1; at -609 (+strand)/ TGACA/score 1; at -584 (-strand)/ TGTCA/score 1; at -494 (+strand)/TGACA /score 1; at -224 (+strand)/TGACG/score 1; and at -49 (-strand)/ GGTCA/score 1.	Os12g0123800 promoter has five binding sites for TF Os03g0727000 at -776 (-strand)/CGTCA/score 1; at -717 (+strand)/TGACC/score 1; at -628 (-strand)/CGTCA /score 1; at -313 (-strand)/TGTCA /score 1; and at -193 (+strand)/TGACG/score 1.		Os03g0622100 promoter contains 8 binding sites for TF Os03g0727000 at -922(+strand)/TGACT/score 1; at -937(-strand)/TGTCA/score 1; at -809(-strand)/CGTCA/score 1; at -742 (-strand)/GGTCA/score 1; at -670 (-strand)/CGTCA/score 1; at -425(+strand)/TGACT/score1; and at -161(-strand)/GGTCA/score1.	Os03g0727000 promoter contains four binding site for self/Os03g0727000(TF) at -574 (-strand)/CGTCA/score1; at -552(+strand)/TGACC/score 1; at -275 (+strand)/TGACT/score 1; and at +39(+strand)/TGACA/score1.	Os05g0129700 promoter contains nine binding site for TF Os03g0727000 at -944 (-strand)/GGTCA/score1; at -901(-strand)/CGTCA/score 1; at -598 (-strand)/AGTCA/score1; at -498(-strand)/CGTCA/score1; at -461(+strand)/TGACG/score1; at -244(+strand)/TGACT/score1; at -119(+strand)/TGACT/score1; at -105 (+strand)/TGACA/score1; and at +67 (+strand)/TGACT/score1.	Os07g0129700 promoter contains three binding sites for Os03g0727000 at -439 (-strand)/GGTCA/score1; at -374 (-strand)/TGTCA/score1; and at-134(+strand)/TGACG/score1.		X	Os05g0140100 promoter has seven binding sites for the TF Os03g0727000 at -940 (-strand)/AGTCA/score 1; at -791 (-strand)/TGTCA/score 1; at -484(-strand)/TGTCA/score1; at -212(+strand)/TGACA/score1; at -70 (+strand)/TGACT/score1; at +7 (-strand)/GGTCA/score1; and +15(-strand)/TGTCA/score1.	X	X		Os01g0141000 promoter has one binding site for TF Os03g0727000 at -752 (-strand)/AGTCA/score 1.	Os03g0182800 promoter has nine binding sites for TF Os03g0727000 at - 952 (-strand)/CTGCA/score 1; at - 864 (-strand)/CTGCA/score 1; at -716 (-strand)/CTGCA/score 1; at -567 (-strand)/TGTCA/score 1; at -468(-strand)/CTGCA/score 1; at -429(+strand)/TGTCA/score 1; at -288(-strand)/TGACG/score 1; at -222 (+strand)/TGACG/score 1; and at -216 (+strand)/TGACT/score 1.	Os02g0579000 promoter has nine binding sites for TF Os03g0727000 at - 861 (+strand)/TGACG/score 1; at - 819 (+strand)/TGACG/score 1; at -805 (-strand)/TGTCA/score 1; at -730(-strand)/CGTCA/score 1; at -713(+strand)/TGACG/score 1; at -544 (+strand)/TGACC/score 1; at -449 (+strand)/TGACA/score 1; at -383(+strand)/TGACA/score 1; and at -181(-strand)/ATGCA/score 1.	Os02g0641300 promoter has six binding sites for TF Os03g0727000 at -797 (+strand)/AGTCA/score 1; at - 618 (+strand)/TGACT/score 1; at -541(+strand)/TGACA/score 1; at -404 (-strand)/CGTCA/score 1; at -280 (+strand)/TGACA/score 1; and at -242 (+strand)/TGACC/score 1.	Os02g0656600 promoter has six binding sites for TF Os03g0727000 at -659 (-strand)/TGTCA/score 1; at -513 (-strand)/TGTCA/score 1; at -502 (+strand)/TGACA/score 1; at -391 (+strand)/TGACA/score 1; at -264 (+strand)/TGACA/score 1; and at -220 (+strand)/TGACG/score 1.	X	Os03g0182800 promoter has five binding sites for TF Os03g0727000 at - 974 (+strand)/TGACT/score 1; at - 638 (+strand)/TGACT/score 1; at -601(-strand)/AGTCA/score 1; at -164 (+strand)/TGACA/score 1; and at +83 (+strand)/TGACC/score 1.
Os07g0129700	O80416	OSH15, OSKN3/Oskn3, HOS3, D6, OSH15/Oskn3, HB253, H15, OsKNOX3		X	X	X	X	Os02g0677300 promoter has binding sites for Os07g0129700 TF at -402 (-strand)/ggcCGTCAca/score 1	Os02g0713700 promoter has binding sites for Os07g0129700 TF at -985 (+strand)/gTGACAgc /score 1	Os02g0764700 promoter has binding sites for Os07g0129700 TF at -462 (-strand)/tccTGTCAga /score 1	X	Os04g0301500 promoter has binding sites for Os07g0129700 TF at -463 (-strand)/aaaTGTCAat /score 1	Os08g0471000 promoter has binding sites for Os07g0129700 TF at +52 (+ strand)/gtTGACGacg /score 1	Os09g0486500 promoter has binding sites for Os07g0129700 TF at -996 (-strand)/cggCGTCAgg /score .97		Os01g0246700 promoter contains two binding sites for TF Os05g0129700 at -480 (+ strand)/ gTGACAgc/score 1; and at -116 (- strand)/ gaTGTCAg/score 0.99.	X	X	Os03g0198600 promoter contains one binding site for TF Os05g0129700 at -387 (+strand)/ agTGACGact/score 0.98.	X	X	X	Os05g0361700 promoter contains one binding site for TF Os05g0129700 at -708 (+ strand)/aaTGACAggt /score 1.	Os05g0474800 promoter contains binding sites for TF Os07g0129700 at -891 (- strand)/ aacTGTCAct/score 1	Os05g0553400 promoter has one binding site for TF Os05g0129700 at -964 (+ strand)/ atTGACGacg/score 1.	Os05g0583000 promoter has one binding sites for TF Os07g0129700 at -716 (+ strand)/aaTGACGgct/score 1.	Os06g0670300 promoter contains one binding site for TF Os05g0129700 at -760 (- strand)/ tgtCGTCAga/score 0.98.	Os08g0428400 promoter contains one binding site for TF Os07g0129700 at -744 (-strand)/cggCGTCAta/score 0.96.	X	X	Os12g0123800 promoter has two binding sites for TF Os07g0129700 at -316 (-strand)/agcTGTCAcc/score 1; and at -195 (+strand)/ttTGACGgcc/score 0.99.		x	x	Os05g0129700 promoter contains one binding site for TF Os07g0129700 at -904 (-strand)/cgaCGTCAgg/score.99	Os07g0129700 promoter contains binding site for self/Os07g0129700 at -377 (-strand)/accTGTCAta/score1.		X	Os05g0140100 promoter has one binding site for the TF Os07g0129700 at +13(- strand)/gcTGTCAc/score 1.	X	X		X	Os03g0182800 promoter has one binding sites for TF Os07g0129700 at - 955 (-strand)/aggCGTCAac/score 0.96.	X	X	Os02g0656600 promoter has wo binding sites for TF Os07g0129700 at -265 (+strand)/aTGACAtc/score 1; and at -222 (+strand)/caTGACGtcc/score 1.	X	X
Os05g0129700	Q7GDL5	OSH71, OsKn2, HOS9		X	X	X	X	Os02g0677300 promoter has binding sites for Os05g0129700 TF at -402 (-strand)/ggcCGTCAca/score 1	Os02g0713700 promoter has binding sites forOs05g0129700 TF at -985 (+strand)/gTGACAgc /score 1	Os02g0764700 promoter has binding sites for Os05g0129700 TF at -462 (-strand)/tccTGTCAga /score 1	X	Os04g0301500 promoter has binding sites for Os05g0129700 TF at -463 (-strand)/aaaTGTCAat /score 1	Os08g0471000 promoter has binding sites for Os05g0129700 TF at +52 (+ strand)/gtTGACGacg /score 1	Os09g0486500 promoter has binding sites for Os05g0129700 TF at -996 (-strand)/cggCGTCAgg /score .96		Os01g0246700 promoter contains two binding sites for TF Os07g0129700 at -480 (+ strand)/gTGACAgc/score 1; and at -116 (- strand)/ gaTGTCAg/score 0.98	X	X	Os03g0198600 promoter contains one binding site for TF Os07g0129700 at -387 (+strand)/ agTGACGact/score 0.97.	X	X	X	Os05g0361700 promoter contains one binding site for TF Os07g0129700 at -708 (+ strand)/aaTGACAggt /score 1	Os05g0474800 promoter contains one binding site for TF Os05g0129700 at -891 (- strand)/ aacTGTCAct/score 1	Os05g0553400 promoter has one binding site for TF Os07g0129700 at -964 (+ strand)/ atTGACGacg/score 1.	Os05g0583000 promoter has one binding site for TF Os05g0129700 at -716 (+ strand)/ aaTGACGgct/score1.	Os06g0670300 promoter contains one binding site for TF Os07g0129700 at -760 (- strand)/ tgtCGTCAga/score 0.97.	Os08g0428400 promoter contains one binding site for TF Os05g0129700 at -744 (-strand)/cggCGTCAta/score 0.96.	X	X	Os12g0123800 promoter has two binding sites for TF Os05g0129700 at -316 (-strand)/agcTGTCAcc/score 1; and at -195 (+ strand)/ttTGACGgcc/score 0.95.		x	x	Os05g0129700 promoter contains one binding site for self/Os05g0129700 at -904 (-strand)/cgaCGTCAgg/score.99.	Os07g0129700 promoter contains one binding site for os05g0129700 at -377 (-strand)/accTGTCAta/score1.		X	Os05g0140100 promoter has one binding site for the TF Os05g0129700 at +13 (-strand)/gcTGTCAc/score 1.	X	X		X	Os03g0182800 promoter has one binding sites for TF Os05g0129700 at - 955 (-strand)/aggCGTCAac/score 0.96.	X	X	Os02g0656600 promoter has two binding sites for TF Os05g0129700 at -265 (+strand)/aTGACAtc/score 1; and at -222 (+strand)/caTGACGtcc/score 1.	X	X
Os12g0123800	Q5CD17	NAC77, NAC077, NAC300, ONAC132, OsDLN250		X	X	Os02g0646200 promoter has binding sites for Os12g0123800 TF at -474 (-strand)/aCACGCaa /score 1; and at -462 (- strand)/aCACGCaaa/score1	X	X	X	Os02g0764700 promoter has binding sites for Os12g0123800 TF at +43 (+strand)/tttGCGTGa/score 0.99	X	Os04g0301500 promoter has binding sites for Os12g0123800 TF at -304 (+strand)/gtaGCGTGc/score 0.99	X	X		X	X	X	X	X	Os03g0437200 promoter has one binding site for TF Os12g0123800 at -206 (+strand)/ gtttGCGTGc/score1.	X	X	X	Os05g0553400 promoter contains one binding site for TF Os12g0123800 at -632 (-strand)/aCACGCgag/score 1.	X	X	Os08g0428400 promoter contains two binding site for TF Os12g0123800 at -808 (+strand)/tttGCGTGa/score .99; and at -214 (+strand)/ttcGCGTGt/score .98.	X	X	X		Os03g0622100 promoter has one binding sites for TF Os12g0123800 at -178 (+strand)/cttaGCGTGc/score 0.99.	Os03g0727000 promoter has one binding site for TF Os12g0123800 at -351 (+strand)/aataGCGTGc/score 0.99.	X	X		X	X	X	X		X	X	Os02g0579000 promoter has one binding site for TF Os12g0123800 at -813 (-strand)/aCACGCaa/score 1.	X	X	X	X
Os02g0579000	Q0E046	OSNAC1, ONAC27, OMTN1, OsDLN60		Os01g0159300 promoter has binding sites for Os02g0579000 TF at -114 (-strand)/gCACGCgatg/score 0.98	X	Os02g0646200 promoter has binding sites for Os02g0579000 TF at -474 (-strand)/aCACGCaa/score 1; and at -462 (--strand)/aCACGCaa/score 1; and at -292 (- strand)/cCACGCgagc/score 0.98.	X	x	Os02g0713700 promoter has binding sites for Os02g0579000 TF at -819 (+strand)/cgtcGCGTGc/score 0.98	Os02g0764700 promoter has binding sites for Os02g0579000 TF at +43 (+strand)/ttGCGTGa /score 0.96	X	Os04g0301500 promoter has binding sites for Os02g0579000 TF at -304 (+ strand)/ gtaGCGTGc/score .99 ; and at -191(+ strand)/cctcGCGTGc /score 0.98.	x	Os09g0486500 promoter has binding sites for Os02g0656600 TF at -861 (+strand)/tagCCGACc /score 0.99 and at -248/cgaCCGACcc/score 0.99		Os01g0246700 promoter has two binding sites for TF Os02g0579000 -325 (+strand)/cgtcGCGTGc /score 0.98, and at -206 (+strand)/gtttGCGTGc/score 1.	X	X	Os03g0198600 promoter has one binding site for TF Os02g0579000 at -758 (+strand)/ gtTGCGTttc/score 0.97.	Os03g0341000 promoter has one binding site for TF Os02g0579000 at -110 (-strand)/gCACGCgagc/score 0.98.	X	X	Os05g0361700 promoter has one binding site for TF Os02g0579000 at -441 (-strand)/cCACGCcact/score 0.98.	X	Os05g0553400 promoter has one binding site for TF Os02g0579000 at -632 (-strand)/aCACGCgag/score 0.98.	X	X	Os08g0428400 promoter has two binding sites for TF Os02g0579000 at -807 (+strand)/ttGCGTGaac/score 1; and at -215(+strand)/gttcGCGTGt/score 0.99.	x	x	x		Os03g0622100 promoter contains one binding site for TF Os02g0579000 at -178 (+strand)/cttaGCGTGc/score 0.99.	Os03g0727000 promoter contains one binding site for TF Os02g0579000 at -351 (+strand)/cttaGCGTGc/score.99	X	X		X	X	X	X		X	x	Os02g0579000 promoter has one binding site for self/ Os02g0579000 at -833(-strand)/aCACGCaa/score 1.	Os02g0641300 promoter has one binding site for TF Os02g0579000 at -119 (+strand)/ttTGCGTatt/score 1.	X	X	X
Os03g0437200	Q75KE5	ZFP36, OsBSRD1, Bsr-d1, OsDLN91		X	X	Os02g0646200 promoter has binding sites for Os03g0437200 TF at -829 (+strand)/ aACACTt/score 1; and at -636 (+ strand)/aACACTc/score1; and -40 (-strand)/ cAGTGTa/score 1	Os02g0676800 promoter has binding sites for Os03g0437200 TF at -515 (+strand)/cACACTc /score 1	Os02g0677300 promoter has binding sites for Os03g0437200 TF at -812 (+strand)/gACACTg /score 1; and at -390 (+ strand)/ cACACTc/score 1	X	X	Os03g0315400 promoter has binding sites for Os03g0437200 TF at -785 (-strand)/gAGTGTa /score 1; and -693 (+ strand)/tACACTa /score 1	Os04g0301500 promoter has binding sites for Os03g0437200 TF at -940 (-strand)/tAGTGTa /score 1; and -830 (- strand)/gAGTGTt /score 1; and at -619 (- strand)/aAGTGTt/score 1	Os08g0471000 promoter has binding sites for Os03g0437200 TF at -113 (+strand)/tACACTg /score 1; and at -97 (- strand)/cAGTGTg/score 1	X		X	X	Os01g0826400 promoter contains binding site for Os03g0437200 (C2H2-TF)at -550 (+strand)/tACACTc/score 1	Os03g0198600 promoter contains three binding sites for Os03g0437200 (C2H2 TF) at -261(+strand)/ gAGTGTg/score 1; and at -426 (-strand)/ gAGTGTa/score 1; and at -630 (+strand)/cACACTa/score 1.	X	X	X	Os05g0361700 promoter contains four binding site for TF Os03g0437200 at -772 (+strand)/aACACTc/score 1; at -300 (-strand)/cAGTGTt/score 1; at -217 (+strand)/gACACTc/score 1; and at -12 (-strand)/aAGTGTg/score1.	Os05g0474800 promoter contains two binding sites for TF Os03g0437200 at -547 (-strand)//score1 and at -472(+strand)/aACACTa/score 1	Os05g0553400 promoter contains three binding site for TF Os03g0437200 at -893 (+strand)/cACACTt/score1; at -643 (+strand)/aACACTc/score 1; and at -523(-strand)/tAGTGTg/score1.	Os05g0583000 promoter contains two binding sites for TF Os03g0437200 at -551 (-strand)/tAGTGTc/score1; and -559(-strand)/tAGTGTa/score1.	Os06g0670300 promoter contains two binding sites for TF Os03g0437200 at -530 (+strand)/cACACTa/score1; and at -369 (+strand)/cACACTa/score 1.	Os08g0428400 promoter contains one binding site for TF Os03g0437200 at -915 (+strand)/cACACTa/score 1.	Os08g0474000 promoter contains two binding sites for TF Os03g0437200 at -632(+strand)/aACACTt/score 1; and at -685 (+strand)/tACACTg/score 1.	Os09g0334500 promoter contains four binding site for TF Os03g0437200 at -992 (+strand)/cACACTt/score1; at -326(+strand)/tACACTt/score1; at -236 (-strand)/aAGTGTc/score1; and at -160 (+strand)/aACACTg/score1.	Os12g0123800 promoter contains one binding site for TF Os03g0437200 at -160 (+strand)/cACACTt/score 1.		Os03g0622100 promoter has three binding sites for TF Os03g0437200 at -860 (+strand)/tACACTg/score 1; at +46 (-strand)/cAGTGTt/score 1; and at +69 (+strand)/aACACTg/score 1.	X	Os03g0727000 promoter has eight high affinity binding sites for TF Os03g0437200 at -837 (+strand)/aACACTt/score 1; at -793 (+strand)/tACACTc/score 1; at -730 (+strand)/tACACTt/score 1; at -588 (-strand)/tAGTGTt/score 1; at -563 (-strand)/tAGTGTt/score 1; at -341 (+strand)/cACACTt/score 1; and -308 (+strand)/cACACTt/score 1; and -280 (-strand)/aAGTGTg/score 1	X		X	Os05g0140100 promoter has two binding sites for the TF Os03g0437200 at -700 (+strand)/gACACTc/score 1; and at -556 (-strand)/tAGTGTa/score 1.	X	Os06g0264200 promoter has one binding site for the TF Os03g0437200 at -753 (-strand)/tAGTGTc/score 1.		Os01g0141000 promoter has three binding sites for TF Os03g0437200 at -998 (+strand)/cACACTa/score 1; at -718 (-strand)/tAGTGTg/score 1; and at -51 (-strand)/cAGTGTc/score1.	X	Os02g0579000 promoter has one binding site for TF Os03g0437200 at -516 (+strand)/gACACTa/score 1.	Os02g0641300 promoter has one binding site for TF Os03g0437200 at -68 (+strand)/aACACTt/score 1.	X	X	Os03g0182800 promoter has two binding sites for TF Os03g0437200 at -644 (-strand)/tAGTGTg/score 1; and at -299 (-strand)/tAGTGTa/scorre 1
Os01g0246700	Q0JP37	OSWRKY1		X	X	Os02g0646200 promoter has binding sites for Os01g0246700 TF at -641 (+strand)/cgGTCAAc /score 1; and at -184 (- strand)/cTTGACtc/score1; and at +71 (-strand)/aTTGACca/score 1		X	Os02g0713700 promoter has binding sites for Os01g0246700 TF at -89 (+strand)/aaGTCAAa /score 1	X	Os03g0315400 promoter has binding sites for Os01g0246700 TF at -349 (+strand)/ggGTCAAa/score and at -357 (+strand)/gaGTCAAc /score 1	X	X	X		X	X	Os01g0826400 promoter contains five binding sites of os01g0246700 (TF-WRKY1) at -54 (+strand)/cgGTCAAag/score 1; at -85 (+strand)/ caGTCAAa/score1; at -250 (+strand)/ agGTCAAaga/score 0.99; at -635 (+ strand)/agGTCAAa/score 1; at -782 (- strand)/tTTGACtt/score 0.98	X	Os03g0341000 promoter has one binding site of os01g0246700 (WRKY-TF) at -307(+strand)/tgGTCAAa/score 1.	Os03g0437200 promoter contains two binding sites for TF Os01g0246700 at -140 (-strand)/tTTGACta/score 1; and at -633 (+strand)/aaGTCAAa/score 1.	X	X	X	X	X	X	X	X	Os09g0334500 promoter contains one binding site for TF Os01g0246700 at -50 (+strand)/cgGTCAAa/score1.	X		Os03g0622100 promoter has five binding sites for TF Os01g0246700 at -403 (+strand)/ctGTCAAcaa/score 0.98; and at -417 (-strand)/tTTGACtc/score 1; -672(+ strand)/accGTCAAcg/score 1; at -743 (+ strand)/ggGTCAAt/score 1; and at -924 (- strand)/tTTGACtt/score 1.	X	Os05g0129700 promoter has two binding sites for TF Os01g0246700 at -246(-strand)/aTTGACtt/score 1; and at -599 (+strand)/taGTCAAg/score 1	X		X	X	X	X		Os01g0141000 promoter has a binding site for TF Os01g0246700 at -752 (+strand)/caGTCAAt/score 1	X	X	X	X	X	Os03g0182800 promoter has one binding site for TF Os01g0246700 at -640 (-strand)/tTTGACtg/score 1
Os05g0583000	Q75HY3	OSWRKY8		X	X	Os02g0646200 promoter has binding sites for Os05g0583000 TF at -641(+strand)/ cgGTCAAc/score 1; and at +70 (- strand)/caTTGACcag/score1	X	X	Os02g0713700 promoter has binding sites for Os05g0583000 TF at -89 (+strand)/aaGTCAAa /score 1	X	X	X	X	X		X	X	Os01g0826400 promoter contains five binding sites for Os05g058300 (WRKY) at -55 (+strand)/acgGTCAAag/score 1; and at-85 (+strand)/caGTCAAa/score 1; and at -250 (+ strand)/ agGTCAAa/score1; at -635 (+strand)/ agGTCAAa/score1; and at -782(+strand)/ tTTGACtt/score 1.	X	Os03g0341000 promoter has binding sites for TF Os05g0583000 at -307 (+strand)/tgGTCAAa/score 1.	Os03g0437200 promoter contains two binding sites for TF Os05g0583000 at -140(-strand)/tTTGACta/score 1; and at -633(+strand)/aaGTCAAa/score 1.	X	X	X	X	X	X	X	X	X	X		Os03g0622100 promoter has five binding sites for TF Os05g0583000 at -403 (+strand)/ctGTCAAcaa/score 0.98; at -417(-strand)/tTTGACtc/score 1; at -672 (+strand)/accGTCAAcg/score 1; at -743 (+strand)/ggGTCAAt/score 1; and at -924 (- strand)/tTTGACtt/score .1	X	Os05g0129700 promoter has two binding sites for TF Os05g0583000 at -246(-strand)/aTTGACtt/score 1; and at -599 (+strand)/taGTCAAg/score 1	X		X	X	X	X		Os01g0141000 promoter has one binding site for TF Os05g0583000 at -752 (+strand)/caGTCAAt/score 1.	X	X	X	X	X	Os03g0182800 promoter has one binding site for TF Os05g0583000 at -640 (-strand)/tTTGACtg/score 1.
Os01g0665500	Q0JKL7	OSWRKY16		X	X	Os02g0646200 promoter has binding sites for Os01g0246700 TF at -641 (+strand)/cgGTCAAc /score 1; and at -184 (- strand)/cTTGACtc/score1; and at +71 (-strand)/aTTGACca/score 1	x	X	Os02g0713700 promoter has binding sites for Os01g0246700 TF at -89 (+strand)/aaGTCAAa /score 1	X	X	X	X	X		X	X	Os01g0826400 promoter contains five binding sites for Os01g0665500 (WRKY) at -54 (+strand)/ cgGTCAAa/score 1; and at-85 (+strand)/caGTCAAa/score 1; at -250 (+ strand)/ agGTCAAa/score 1; at -636 (+strand)/ gagGTCAAaa/score1; and at -782 (+strand)/ tTTGACtt/score 1.	X	Os03g0341000 promoter has one binding site for TF Os01g0665500 at -307 (+strand)/tgGTCAAa/score 1.	Os03g0437200 promoter contains two binding sites for TF Os01g0665500 at -140 (-strand)/tTTGACta/score 1; and at -633 (+strand)/aaGTCAAa/score 1.	X	X	X	X	X	X	X	X	Os09g0334500 promoter contains one binding site for TF Os01g0665500 at -50 (+strand)/cgGTCAAa/score1.	X		Os03g0622100 promoter has five binding sites for TF Os01g0665500 at -403 (+strand)/ctGTCAAcaa/score 0.98; at -417(- strand)/tTTGACtc/score 1; at -672 (+ strand)/accGTCAAcg/score 1; at -743 (+strand)/ggGTCAAt/score 1; and at -924 (- strand)/tTTGACtt/score 1.	X	Os05g0129700 promoter has two binding sites for TF Os01g0665500 at -246(-strand)/aTTGACtt/score 1; and at -599 (+strand)/taGTCAAg/score 1	X		X	X	X	X		Os01g0141000 promoter has a binding site for TF Os01g0665500 at -752 (+strand)/caGTCAAt/score 1.	X	X	X	X	X	Os03g0182800 promoter has one binding site for TF Os01g0665500 at -640 (-strand)/tTTGACtg/score 1
Os01g0826400	Q6IEQ7	OSWRKY24		X	X	Os02g0646200 promoter has binding sites for Os01g0826400 TF at -641(+strand)/ cgGTCAAc/score 1; and at +70 (- strand)/caTTGACcag/score1	X	X	Os02g0713700 promoter has binding sites for Os01g0826400 TF at -90(+strand)/ caaGTCAAag/score 1	X	X	X	X	X		X	X	Os01g0826400 promoter contains five binding sites for Os01g0826400 (WRKY24) at -55 (+strand)/ acgGTCAAag/score 1 and at-86 (+strand)/ccaGTCAAac/score 1 and at -251 (+ strand)/ cagGTCAAag/score 1; at -636(+strand)/ gagGTCAAaa/score1; and at -783(+strand)/ gtTTGACttg/score 1.	X	Os03g0341000 promoter has one binding site of Os01g0826400 at -308 (+strand)/ttgGTCAAat/score1.	Os03g0437200 promoter contains two binding sites for TF Os01g0826400 at -140 (-strand)/tTTGACta/score 1; and at -633 (+strand)/aaGTCAAa/score 1.	X	X	X	X	X	X	X	X	Os09g0334500 promoter contains binding site for TF Os01g0826400 at -50 (+strand)/cgGTCAAa/score .98.	X		Os03g0622100 promoter has three binding sites for TF Os01g0826400 at -418 (-strand)/ttTTGACtct/score 1; and at -743 (+strand)/ggGTCAAt/score 0.96; and at -925 (-strand)/tTTGACtt/score 1.	X	X	X		X	X	X	X		X	X	X	X	X	X	Os03g0182800 promoter has one binding site for TF Os01g0826400 at -641 (-strand)/gtTTGACtgt/score 1.
Os03g0321700	Q10M65	OSWRKY31		X	X	Os02g0646200 promoter has binding sites for Os03g0321700 TF at -641 (+strand)/cgGTCAAc /score 1; and at +71 (--strand)/ aTTGACca/ score 0.99.	X	X	X	X	X	X	X	X		X	X	Os01g0826400 promoter has four binding sites for TF Os03g0321700 at -635 (+strand)/agGTCAAa/score 0.91; and at -250 (+strand)/agGTCAAa/ score 0.91; and at -67(-strand)/tTTGACca/score 0.99; and at -60(+strand)/aGTCAAcggt/score 1; and at -54(+strand)/cgGTCAAa/score 0.99	X	Os03g0341000 promoter has one binding site for TF Os03g0321700 at -307 (+strand)/tgGTCAAa/score 0.99	Os03g0437200 promoter has one binding site for TF Os03g0321700 at -140 (-strand)/tTTGACta/score 0.92.	X	X	X	X	X	X	X	X	X	X		Os03g0622100 promoter has two binding sites for TF Os03g0321700 at -401 (+strand)/ctGTCAAcaa/score 0.97; and at -670 (+strand)/cGTCAAcgcc/score 0.99.	X	X	X		X	X	X	X		X	x	X	X	X	X	x
Os05g0474800	Q65WW1	OSWRKY70		X	X	Os02g0646200 promoter has binding sites for Os05g0474800 TF at -641(+strand)/ cgGTCAAc/score 1; and at +70 (- strand)/caTTGACcag/score1	X	X	Os02g0713700 promoter has binding sites for Os05g0474800 TF at -89 (+strand)/aaGTCAAa /score 1	X	X	X	X	X		X	X	Os01g0826400 promoter contains five binding sites for Os05g0474800 (WRKY70) at -55 (+strand)/ acgGTCAAag/score 1; at-86 (+strand)/ccaGTCAAac/score 1; at -251 (+ strand)/ cagGTCAAagg/score1; at -636 (+strand)/ gagGTCAAaa/score1; and at -783 (+strand)/ gtTTGACttg/score 1.	X	Os03g0341000 promoter has binding sites for TF Os05g0474800 at -308(+)strand/ ttgGTCAAat/ score 1.	Os03g0437200 promoter contains two binding sites for Os05g0474800 at -140 (-strand)/tTTGACta/score 1; and at -634 (+strand)/taaGTCAAac/score 1.	X	X		X	X	X	X	X	X	X		Os03g0622100 promoter has five binding sites for TF Os05g0474800 at -403 (+strand)/ctGTCAAcaa/score 0.98; at -417(-strand)/tTTGACtc/score 1; at -672 (+strand)/accGTCAAcg/score 1; at -743 (+strand)/ggGTCAAt/score 1; and at -924 (-strand)/tTTGACtt/score 1	x	X	x		X	X	X	X		X	X	X	X	X	X	Os03g0182800 promoter has one binding site for TF Os05g0474800 at -641 (-strand)/gtTTGACtgt/score 1.
Os02g0181300	Q6QHD1	OSWRKY71		X	X	Os02g0646200 promoter has 3 WRKY (Os02g0181300) binding sites at +70 (-strand)/caTTGACcag/score 1 and at -184(-strand)/cTTGACtc/score 1 and at -642(+ STRAND)/acgGTCAAca/score1	X	X	Os02g0713700 promoter has one TF (Os02g0181300) binding sites at -89 (+ strand) /aaGTCAAa /score1	X	X	X	X	X				Os01g0826400 promoter has five binding sites for Os02g0181300 TF at -61(+strand)/caGTCAAcgg/score 1; at -85(+strand)/caGTCAAa/score 1; at -250 (+strand)/agGTCAAa/score 1; at -635(+ strand)/agGTCAAa/score 1 and at -782 (-strand)/tTTGACtt/score 1	X	Os03g0341000 promoter has one binding site for TF Os02g0181300 at -307 (+strand)/tgGTCAAa/score 1.	Os03g0437200 promoter has two binding sites for TF Os02g0181300 at -140 (-strand)/tTTGACta/score 1; and at -633 (+ strand)/aaGTCAAa/score 1.	X								Os09g0334500 promoter has one binding site for Os02g0181300 TF at -50 (+strand)/cgGTCAAa/score 1.	X		Os03g0622100 promoter has five binding site for Os02g0181300 TF at -402 (+strand)/ctGTCAAcaa/score 0.98; at -417 (-strand)/tTTGACtc/score 1; at -672( +strand)/accGTCAAcg/score 1; at -743(+ strand)/ggGTCAAt/score 1; and at -924 (-strand)/tTTGACtt/score 1.	X	Os05g0129700 promoter has two binding sites for Os02g0181300 TF at -246 (-strand)/aTTGACtt/score 1; and at -599 (+strand)/taGTCAAg/score 1.	X		X	X	X	X		Os01g0141000 promoter has one binding site for Os02g0181300 TF at -752 (+strand)/caGTCAAt/score 1.	x	X	X	x	X	Os03g0182800 promoter has one binding site for Os02g0181300 TF at -640 (-strand)/tTTGACtg/score 1
Os09g0334500	Q6ERI5	OSWRKY74		X	X	Os02g0646200 promoter has binding sites for Os09g0334500 TF at -641(+strand)/ cgGTCAAc/score 1; and at +70 (- strand)/caTTGACcag/score1	X	X	Os02g0713700 promoter has binding sites forOs09g0334500 TF at -90 (+strand)/caaGTCAAag /score 1	X	X	X	X	X		X	X	Os01g0826400 promoter contains binding sites for Os09g0334500 (WRKY74) at -55 (+strand)/ cgGTCAAag/score 1; at-85(+strand)/caGTCAAa/score 1; at -250(+ strand)/agGTCAAag/score1; at -635(+strand)/ agGTCAAaa/score1; and at -782(+strand)/ tTTGACtt/score 0.98.	X	Os03g0341000 promoter has binding sites for TF Os09g0334500 at -308(+)strand/ ttgGTCAAat/ score 1.	Os03g0437200 promoter contains two binding sites for TF Os09g0334500 at -140(-strand)/tTTGACta/score 1; and at -633 (+strand)/aaGTCAAa/score 1.	X	X	X	X	X	X	X	X	X	X		Os03g0622100 promoter has five binding sites for TF Os09g0334500 at -403 (+strand)/ctGTCAAcaa/score 0.98; and at -417(-strand)/tTTGACtc/score 1; at -672(+strand)/accGTCAAcg/score 1; at -743 (+strand)/ggGTCAAt/score 1; and at -924 (- strand)/tTTGACtt/score 1.	X	Os05g0129700 promoter has one binding sites for TF Os09g0334500 at -248(-strand)/tcaTTGACtt/score 1.	X		X	X	X	X		X	X	X	X	X	X	Os03g0182800 promoter has a binding site for TF Os09g0334500 at -640 (-strand)/tTTGACtg/score 0.98
Os12g0616400	Q2QM59	PCF8		X	X	Os02g0646200 promoter has binding sites for Os12g0616400 TF at -92 (+strand)/GGCCC /score 1; and many sites with score 0.75	Os02g0676800 promoter has seven binding sites for Os12g0616400 TF at -836 (+ strand)/ ttggGCACCa/score .99; and at -618 (+ strand)/GGCCC/score 1; and at -580 /GGGCC/score 1 and at -446(+strand) / GGGCC/score 1; and -243 (+ strand)/ccagGCACCa/score 0.99; and at -122 (+ strand)/GGGCC/score 1; and at -80 (+ strand)/GGACC/score 1	X	Os02g0713700 promoter has binding sites for Os12g0616400 TF at -505 (+ strand)/GGACC /score 1; and at -406 (+ strand)/ GGCCC/score 1	Os02g0764700 promoter has binding sites for Os12g0616400 TF at -762 (+ strand)/GGGCC /score 1; and at -528 (+ strand)/GGTCC/score 1; and at -403 (+ strand)/GGGCC/score 1; and at +90 (- strand)/tGGTGCcgag/score 0.99	Os03g0315400 promoter has binding sites for Os12g0616400 TF at -453 (+strand)/ GGACC/score 1; and at -119 (+strand)/GGTCC/score 1; and many with score 0.75	Os04g0301500 promoter has binding sites for Os12g0616400TF at -171 (+ strand)/GGGCC /score 1; at -121(+ strand)/GGTCC/score 1; and at -64 (+ strand)/GGGCC/score 1	X	Os09g0486500 promoter has binding sites for Os12g0616400 TF at -711 (+ strand)/ GGTCC/score 1; and at -637 (+ strand)/GGGCC /score 1; and -180 (+ strand)/ GGGCC/score 1		Os01g0246700 promoter has four high affinity binding sites for TF Os12g0616400 at -926 (+strand)/GGGCC/score 1; and at -399 (+strand)/GGGCC/score 1; and -203 (+strand)/ctcgGCACCa/score 0.99; and at +74 (+strand)/GGGCC/score 1. There many low affinity sites with score 0.75	X	Os01g0826400 promoter has two high afffinity binding sites for TF Os12g0616400 at -891 (+strand)/GGTCC /score 1; and at -171 (+strand)/GGCCC/score 1; and many low affinity sites with score 0.75.	X	Os03g0341000 promoter has seven high affinity binding sites for TF Os12g0616400 at -944 (+strand)/GGGCC/score 1; at -854 (+strand)/GGACC/score 1; at -820 (+strand)/ggcaGCACCa/score 0.97; at -545 (+strand)/GGCCC/score 1; at -493 (+strand)/GGGCC/score 1; at -423(+strand)/GGGCC/score 1; and at +63 (+strand)/GGACC/score 1.	Os03g0437200 promoter has many low affinity binding sites for TF Os12g0616400 with score 0.75.	X	X	X	X	X	Os06g0670300 promoter has many low affinity binding sites for TF Os12g0616400 with score 0.75	X	X	Os09g0334500 promoter has one high affiniity binding site for TF Os12g0616400 at -687 (+strand)/GGGCC/score 1; and many low affinity sites (score 0.75).	Os12g0123800 promoter has two high affiniity binding site for TF Os12g0616400 at -954 (+strand)/GGTCC/score 1; and at -887(+strand)/GGACC/score 1; and many low affinity sites (score 0.75).		Os03g0622100 promoter has one high affinity binding sites for TF Os12g0616400 at -511 (+/-strand)/GGGCC/score 1 and many low affinitty sites.	Os03g0727000 promoter contains two high affinity binding sites for TF Os12g0616400 at -633 (+/-strand)/GGGCC/score 1; and at -322 (-/+ strand)/GGGCC/score 1.	Os05g0129700 promoter has one high affinity binding sites for TF Os12g0616400 at -953 (+ /-strand)/GGGCC/score 1 and many low affinitty sites.	X		Os01g0285300 promoter has one binding site for the TF Os12g0616400 AT -191(+/- strand)/GGGCC/score1; and many low affinity biinding sites with score 0.75.	X	X	X		Os01g0141000 promoter has three high affinity binding site for TF Os12g0616400 at -317 (-/+strand)/tGGTGCtttg/score 0.97; and at -303 (+/-strand)/GGACC/score 1; at -73 +/-strand)/GGTCC/score 1; and many low affinity sites with score 0.75.	X	X	X	Os02g0656600 promoter has two high affinity binding site for TF Os12g0616400 at -719 (-/+strand)/GGTCC/score 1; and at -354 (+/-strand)/GGCCC/score 1; and many low affinity sites with score 0.75.	X	Os03g0182800 promoter has two high affinity binding site for TF Os12g0616400 at -802 (-/+strand)/GGTCC/score 1; and at -113(+/- strand)/GGCCC/score 1; and many low affinity sites with score 0.75.
Os05g0513100	Q5TKH1	OsTCP18, TCP18		X	X	X	Os02g0676800 promoter has binding sites for Os05g0513100 TF at -836 (+ strand)/ ttggGCACCa/score .99; and at -582 (+ strand)/ctGGGCCcgg/score 0.97 and at -243 (+ strand)/ccagGCACCa/score 0.99	X	Os02g0713700 promoter has binding sites for Os05g0513100 TF at -983 (+ strand)/gacaGCACCa /score 0.97	Os02g0764700 promoter has binding sites for Os05g0513100 TF at -530(-strand)/gtGGTCCa/score 0.95 and at +90 (- strand)/tGGTGCcgag/score .99	Os03g0315400 promoter has binding sites for Os05g0513100 TF at -445 (+strand)/ gtGGGCCcca/score 0.97; and at -121 (- strand)/atGGTCCt/score 0.93	Os04g0301500 promoter has binding sites forOs05g0513100 TF at -171 (+ strand)/gggCCCAC /score 1 and at -66 (+ strand)/GTGGGccc/score 1	X	X		Os01g0246700 promoter has two binding sites for TF Os05g0513100 at -928 (+strand)/gtGGGCCcag/score 1; and -203 (+strand)/ctcgGCACCa/score 0.99.	X	Os01g0826400 promoter has one binding site for TF Os05g0513100 at -171 (+strand)/ggcCCCAC/score 0.97.	X	Os03g0341000 promoter has two binding sites for TF Os05g0513100 at -946 (+strand)/taGGGCCcaa/score 0.97; and at -820 (+strand)/ggcaGCACCa/score 0.97	X	X	X	X	X	X	X	X	X	X	X		X	Os03g0727000 promoter contains one binding site for TF Os05g0513100 at -324 (+/-strand)/atGGGCCcaa/score.99.	X	X		X	X	X	X		Os01g0141000 promoter has three binding sites for TF Os05g0513100 at -317 (-strand)/tGGTGCtttg/score 0.97; at -304 (+strand)/gGGACCaa/score 0.98; and at -75 (-strand)/ttGGTCCa/score 0.93.	X	X	X	Os02g0656600 promoter has one binding site for TF Os05g0513100 at -927 (+strand)/ggttGCACCa/score 0.97.	X	Os03g0182800 promoter has one binding site for TF Os05g0513100 at -804 (-strand)/ttGGTCCa/score 0.93.
Transcription factors that do not have binding sites within the promoter region of any gene in this group
Os12g0138500	Q2QXZ2	NH5; BLADE-ON-PETIOLE3 (OsBOP3)		X	X	X	X	X	X	X	X	X	X	X		X	X	X	X	X	X	X	X	X	X	X	X	X	X	X	X		X	X	X	X		X	X	X	X		X	X	X	X	X	X	X
Os06g0264200	Q0DD26	OSCOL16 (CONSTANS-like protein 16); Zinc finger TF														X	X	X	X	X	X	X	X	X	X	X	X	X	X	X	X		X	X	X	X		X	X	X	X		X	X	X	X	X	X	X
Os10g0456800	Q337P2	DCA1 (DST Co-activator 1)		X	X	X	X	X	X	X	X	X	X	X		X	X	X	X	X	X	X	X	X	X	X	X	X	X	X	X		X	X	X	X		X	X	X	X		X	X	X	X	X	X	X
Os03g0198600	Q10QF2	HOX12 (HOMEOBOX GENE 12 ), Oshox12, OsHox12		X	X	X		X	X	X	X	X	X	X		X	X	X	X	X	X	X	X	X	X	X	X	X	X	X	X		X	X	X	X		X	X	X	X		X	X	X	X	X	X	X
Os11g0603000	Q2R1J3	ILI2 (INCREASED LEAF INCLINATION 2)		X	X	X	X	X	X	X	X	X	X	X		X	X	X	X	X	X	X	X	X	X	X	X	X	X	X	X		X	X	X	X		X	X	X	X		X	X	X	X	X	X	X
Os11g0490600	Q2R435	OsLAZY1		X	X	X	X	X	X	X	X	X	X	X		X	X	X	X	X	X	X	X	X	X	X	X	X	X	X	X		X	X	X	X		X	X	X	X		X	X	X	X	X	X	X
Os06g0670300	A0A0P0X0C0	OSMPH1 (MYB-like gene of Plant Height 1)/OsMYB45		X	X	X	X	X	X	X	X	X	X	X		X	X	X	X	X	X	X	X	X	X	X	X	X	X	X	X		X	X	X	X		X	X	X	X		X	X	X	X	X	X	X
Os05g0140100 (bait)	Q688D6	OSMYB2P-1 (MYB2 phosphate-responsive gene 1)		X	X	X	X	X	X	X	X	X	X	X		X	X	X	X	X	X	X	X	X	X	X	X	X	X	X	X		X	X	X	X		X	X	X	X		X	X	X	X	X	X	X
Os01g0285300	Q9AQV2	OSMYB61, MYB61		X	X	X	X	X	X	X	X	X	X	X		X	X	X	X	X	X	X	X	X	X	X	X	X	X	X	X		X	X	X	X		X	X	X	X		X	X	X	X	X	X	X
Os03g0315400	Q10MB4	OSMYB2		X	X	X	X	X	X	X	X	X	X	X		X	X	X	X	X	X	X	X	X	X	X	X	X	X	X	X		X	X	X	X		X	X	X	X		X	X	X	X	x	X	x
Os01g0975300	Q0JFK3	OSMYB48, OSMYB48-1, OSMYB48-2		X	X	X	X	X	X	X	X	X	X	X		X	X	X	X	X	X	X	X	X	X	X	X	X	X	X	X		X	X	X	X		X	X	X	X		X	X	X	X	X	X	X
Os05g0553400	Q6I634	OSMYB55 (R2R3-MYB Transcription Factor 55)/OsPL (purple leaf 9)		X	X	X	X	X	X	X	X	X	X	X		X	X	X	X	X	X	X	X	X	X	X	X	X	X	X	X		X	X	X	X		X	X	X	X		X	X	X	X	X	X	X
Os12g0111400	Q2QYP2	no RAP gene name; Helix-loop-helix DNA-binding domain containing protein; OSbHLH161 (PMID:16896230)		X	X	X	X	X	X	X	X	X	X	X		X	X	X	X	X	X	X	X	X	X	X	X	X	X	X	X		X	X	X	X		X	X	X	X		X	X	X	X	X	X	X
Os04g0301500	Q0JEB7	RERJ1/OsbHLH6,		X	X	X	X	X	X	X	X	X	X	X		X	X	X	X	X	X	X	X	X	X	X	X	X	X	X	X		X	X	X	X		X	X	X	X		X	X	X	X	x	X	x
Os03g0188400	Q8H7N8	OsbHLH96		X	X	X	X	X	X	X	X	X	X	X		X	X	X	X	X	X	X	X	X	X	X	X	X	X	X	X		X	X	X	X		X	X	X	X		X	X	X	X	X	X	X
Os03g0182800	Q7XBH8	OSEBP89; Ethylene-responsive element binding protein, clone 89.		X	X	X	X	X	X	X	X	X	X	X		X	X	X	X	X	X	X	X	X	X	X	X	X	X	X	X		X	X	X	X		X	X	X	X		X	X	X	X	X	X	X
Os04g0612500	B9FCG2	OsHyPRP16; Hybrid proline-rich protein 16		X	X	X	X	X	X	X	X	X	X	X		X	X	X	X	X	X	X	X	X	X	X	X	X	X	X	X		X	X	X	X		X	X	X	X		X	X	X	X	X	X	X
Os09g0486500	A3C039	SAP1, Osi-SAP1, ISAP1, OsiSAP1, OSISAP1, OsSAP1		X	X	X	X	X	X	X	X	X	X	X		X	X	X	X	X	X	X	X	X	X	X	X	X	X	X	X		X	X	X	X		X	X	X	X		X	X	X	X	x	X	x
Os01g0159300	Q0JQI1	Zinc finger, RING/FYVE/PHD-type domain containing protein		X	X	X	X	X	X	X	X	X	X	X		X	X	X	X	X	X	X	X	X	X	X	X	X	X	X	X		X	X	X	X		X	X	X	X		X	X	X	X	x	X	x
Os02g0646200	Q6H630	no RAP gene name; OSBBX6		X	X	X	X	X	X	X	X	X	X	X		X	X	X	X	X	X	X	X	X	X	X	X	X	X	X	X		X	X	X	X		X	X	X	X		X	X	X	X	x	X	x
Os12g0113700	A0A0P0Y689	no RAP gene name; Similar to Zinc finger, C3HC4 type family protein		X	X	X	X	X	X	X	X	X	X	X		X	X	X	X	X	X	X	X	X	X	X	X	X	X	X	X		X	X	X	X		X	X	X	X		X	X	X	X	X	X	X
Os12g0621100	Q2QM17	OsYABBY6; no RAP gene name		X	X	X	X	X	X	X	X	X	X	X		X	X	X	X	X	X	X	X	X	X	X	X	X	X	X	X		X	X	X	X		X	X	X	X		X	X	X	X	X	X	X
Os02g0641300	Q0DZ73	no RAP gene name		X	X	X	X	X	X	X	X	X	X	X		X	X	X	X	X	X	X	X	X	X	X	X	X	X	X	X		X	X	X	X		X	X	X	X		X	X	X	X	X	X	X
Os02g0676800 (bait)	Q6EP81	no RAP gene name; OsERF20 (PMID:16407444)		X	X	X	X	X	X	X	X	X	X	X		X	X	X	X	X	X	X	X	X	X	X	X	X	X	X	X		X	X	X	X		X	X	X	X		X	X	X	X	x	X	x
Os02g0713700	Q6ZFU2	no RAP gene name		X	X	X	X	X	X	X	X	X	X	X		X	X	X	X	X	X	X	X	X	X	X	X	X	X	X	X		X	X	X	X		X	X	X	X		X	X	X	X	x	X	x
Os02g0828900	Q6K7P0	no RAP gene name; OsJMJ-C4 (PMID: 29960182)		X	X	X	X	X	X	X	X	X	X	X		X	X	X	X	X	X	X	X	X	X	X	X	X	X	X	X		X	X	X	X		X	X	X	X		X	X	X	X	X	X	X
Os03g0622100	Q10GM4	no RAP gene name		X	X	X	X	X	X	X	X	X	X	X		X	X	X	X	X	X	X	X	X	X	X	X	X	X	X	X		X	X	X	X		X	X	X	X		X	X	X	X	X	X	X
Os05g0589400	Q6I5E6	no RAP gene name		X	X	X	X	X	X	X	X	X	X	X		X	X	X	X	X	X	X	X	X	X	X	X	X	X	X	X		X	X	X	X		X	X	X	X		X	X	X	X	X	X	X
Os08g0428400	Q6ZJU3	no RAP gene name; OsJAZ3 /TIFY6a/		X	X	X	X	X	X	X	X	X	X	X		X	X	X	X	X	X	X	X	X	X	X	X	X	X	X	X		X	X	X	X		X	X	X	X		X	X	X	X	X	X	X
Os08g0471000	Q6Z9R8	no RAP gene name; in Uniprot suggested names: HSFB4A (heat stress transcription factor B-4a) and Alternative names Heat stress transcription factor 20 (OsHsf-20).		X	X	X	X	X	X	X	X	X	X	X		X	X	X	X	X	X	X	X	X	X	X	X	X	X	X	X		X	X	X	X		X	X	X	X		X	X	X	X	x	X	x
Os11g0111800	A3C7W7	no RAP gene name; uniprot suggests TF activity and nuclear localization.		X	X	X	X	X	X	X	X	X	X	X		X	X	X	X	X	X	X	X	X	X	X	X	X	X	X	X		X	X	X	X		X	X	X	X		X	X	X	X	X	X	X
		31 TFs have no binding site present in the promoter region of any genes included in the group of 57 TFs
[truncated: 15 more columns]
